# Supplementary material
Source: publisher site journal article supplement (https://www.spandidos-publications.com/8697/downloadSupplementary)
Supplement: Supplementary file 1 [file downloadSupplementary]

## Sheet: Table SI
Table SI. Composition of the custom-designed phenylalanine diets.
Ingredient	20 g/kg phenylalanine	10 g/kg phenylalanine	2.5 g/kg phenylalanine
L-arginine	10	10	10
L-histidine-HCl-H2O	6	6	6
L-isoleucine	8	8	8
L-leucine	12	12	12
L-lysine-HCl	14	14	14
L-methionine	6	6	6
L-phenylalanine	20	10	2.5
L-threonine	8	8	8
L-tryptophan	2	2	2
L-valine	8	8	8
L-alanine	10	10	10
L-asparagine-H2O	5	5	5
L-aspartate	10	10	10
L-cystine	4	4	4
L-glutamic acid	30	30	30
L-glutamine	5	5	5
Glycine	10	10	10
L-proline	5	5	5
L-serine	5	5	5
L-tyrosine	4	4	4
Total L-amino acids	182	172	164.5
Corn starch	492.1	502.1	509.6
Maltodextrin 10	125	125	125
Sucrose	46.4	46.4	46.4
Cellulose	50	50	50
Soybean oil	50	50	50
Mineral mix	35	35	35
Sodium bicarbonate	7.5	7.5	7.5
Vitamin mix	10	10	10
Choline bitartrate	2	2	2
Total	1000	1000	1000
HCl, hydrogen chloride; H2O, water.

## Sheet: Table SII
Table SII. Primer sequences.
Primer	Sequence (5'-3')
β-actin F (NM_007393)	AGTGTGACGTTGACATCCGT
β-actin R (NM_007393)	GCAGCTCAGTAACAGTCCGC
IL-1β F	ACCTAGCTGTCAACGTGTGG
IL-1β R	TCAAAGCAATGTGCTGGTGC
IL-6 F	TAGTCCTTCCTACCCCAATTTCC
IL-6 R	TTGGTCCTTAGCCACTCCTTC
IL-12B F	TGGTTTGCCATCGTTTTGCTG
IL-12B R	ACAGGTGAGGTTCACTGTTTCT
IL-23A F	CACCAGCGGGACATATGAATCT
IL-23A R	CACTGGATACGGGGCACATT
IL-17A F	TTTAACTCCCTTGGCGCAAAA
IL-17A R	CTTTCCCTCCGCATTGACAC
IL-17F F	CGTGAAACAGCCATGGTCAA
IL-17F R	TTTGGGGTTCTTCCGAGCTG
IL-22 F	ATGAGTTTTTCCCTTATGGGGAC
IL-22 R	GCTGGAAGTTGGACACCTCAA
CXCL1 F	CTGGGATTCACCTCAAGAACATC
CXCL1 R	CAGGGTCAAGGCAAGCCTC
CXCL2 F	CCCAGACAGAAGTCATAGCCAC
CXCL2 R	TGGTTCTTCCGTTGAGGGAC
CXCL3 F	CCCAGACAGAAGTCATAGCCACT
CXCL3 R	TTCATCATGGTGAGGGGCTTC
RORC F	GTGGAGTTTGCCAAGCGGCTTT
RORC R	CCTGCACATTCTGACTAGGACG
F, forward; R, reverse; CXCL, C-X-C motif chemokine ligand; RORC, RAR-related orphan receptor C.
